# Supplementary material for: Tensor radiomics: paradigm for systematic incorporation of multi-flavoured radiomics features
Source: PubMed Central journal article supplement — Quant Imaging Med Surg. 2023 Nov 7;13(12):7680–94. doi: 10.21037/qims-23-163 (PMC10722050; doi:10.21037/qims-23-163), 2023-11-07
Supplement: qims-13-12-7680-supplementary.pdf [file qims-13-12-7680-supplementary.pdf]

## Appendix 1 Fusion techniques

Multi-scale transform (MST) theories are popularly deployed in various image fusion scenarios such as classical MST-based fusion methods including pyramid-based methods like Laplacian pyramid (LP) (40), and ratio of low-pass pyramid (RP) (41), wavelet-based methods like discrete wavelet transform (DWT) (42) and dual-tree complex wavelet transform (DTCWT) (43), and multi-scale geometric analysis (MGA)-based methods like curvelet transform (CVT) (44) and nonsubsampling contourlet transform (NSCT) (45). Generally, MST-based fusion methods consist of three steps (46). First, decompose the source images into a multi-scale transform domain. Then, merge the transformed coefficients with a given fusion rule. Finally, reconstruct the fused image by performing the corresponding inverse transform over the merged coefficients. Sparse representation (SR) addresses the signals' natural sparsity, which is in accord with the physiological characteristics of human visual system (47). In SR-based image processing methods, the sparse coding technique is often performed on local image patches for the sake of algorithm stability and efficiency (48). The sliding window technique is adopted in their method to make the fusion process more robust to noise and misregistration. In (45), the sparse coefficient vector is used as the activity level measurement. NSCT + SR, DTCWT + SR, and CVT + SR are three fusion methods that mixture of MST-based and SR-based methods. In general, the low-pass MST bands are merged with an SR-based fusion approach while the high-pass MST bands are fused using the conventional "max absolute" rule with a local window-based consistency verification scheme (42,49). CBF fuses source images by weighted average using the weights computed from the detail images that are extracted from the source images using CBF. Here, the weights are computed by measuring the strength of details in a detail image obtained by subtracting CBF output from original image (50). Principal component analysis (PCA), Hue, Saturation, and Intensity (HSI), Wavelet and Weighted are other fusion methods that were used in this work (51,52).

## References

40. Burt PJ, Adelson EH. The Laplacian Pyramid as a Compact Image Code. In: Fischler MA, Firschein O, editors. *Readings in Computer Vision*. San Francisco (CA): Morgan Kaufmann; 1987. p. 671-9.
41. Toet A. Image fusion by a ratio of low-pass pyramid. *Pattern Recognit Lett* 1989;9:245-53.
42. Li H, Manjunath BS, Mitra SK. Multisensor Image Fusion Using the Wavelet Transform. *Graphical Models and Image Processing* 1995;57:235-45.
43. Lewis JJ, O'Callaghan RJ, Nikolov SG, Bull DR, Canagarajah N. Pixel- and region-based image fusion with complex wavelets. *Inf Fusion* 2007;8:119-30.
44. Nencini F, Garzelli A, Baronti S, Alparone L. Remote sensing image fusion using the curvelet transform. *Inf Fusion* 2007;8:143-56.
45. Zhang Q, Guo BL. Multifocus image fusion using the nonsubsampling contourlet transform. *Signal Processing* 2009;89:1334-46.
46. Piella G. A general framework for multiresolution image fusion: from pixels to regions. *Inf Fusion*. 2003;4:259-80.
47. Jiang Z, Han D, Chen J, Zhou X. A wavelet based algorithm for multi-focus micro-image fusion. In: *Third International Conference on Image and Graphics (ICIG'04)*; 2004. p. 176-9.
48. Zhang Q, Liu Y, Blum RS, Han J, Tao D. Sparse representation based multi-sensor image fusion for multi-focus and multi-modality images: A review. *Information Fusion* 2018;40:57-75.
49. Liu Y, Liu S, Wang Z. A general framework for image fusion based on multi-scale transform and sparse representation. *Inf Fusion* 2015;24:147-64.
50. Shreyamsha Kumar BK. Image fusion based on pixel significance using cross bilateral filter. *J VLSI Signal Process Syst Signal Image Video Technol* 2015;9:1193-204.
51. Sahu D, Parsai MP. Different image fusion techniques—a critical review. *Int j mod educ comput sci [Internet]*. 2012.
52. Pajares G, Manuel de la Cruz J. A wavelet-based image fusion tutorial. *Pattern Recognit* 2004;37:1855-72.

**Table S1** List of fusions techniques explored in section Results of using fusion flavours

|                                  |                                  |                                    |                                             |                                           |
|----------------------------------|----------------------------------|------------------------------------|---------------------------------------------|-------------------------------------------|
| Fusion techniques                | Sparse representation (SR)       | Bilateral Cross Filter (BCF)       | Hue, Saturation and Intensity Fusion        | Weighted fusion                           |
|                                  | Laplacian pyramid (LP)           | Principal component analysis (PCA) | Ratio of low-pass pyramid (RP)              |                                           |
| Wavelet-family fusion techniques | Discrete wavelet transform (DWT) | Curvelet transform (CVT)           | Dual-tree complex wavelet transform (DTCWT) | Nonsubsampled contourlet transform (NSCT) |
|                                  | NSCT + SR                        | DTCWT + SR                         | CVT + SR                                    | Wavelet fusion                            |

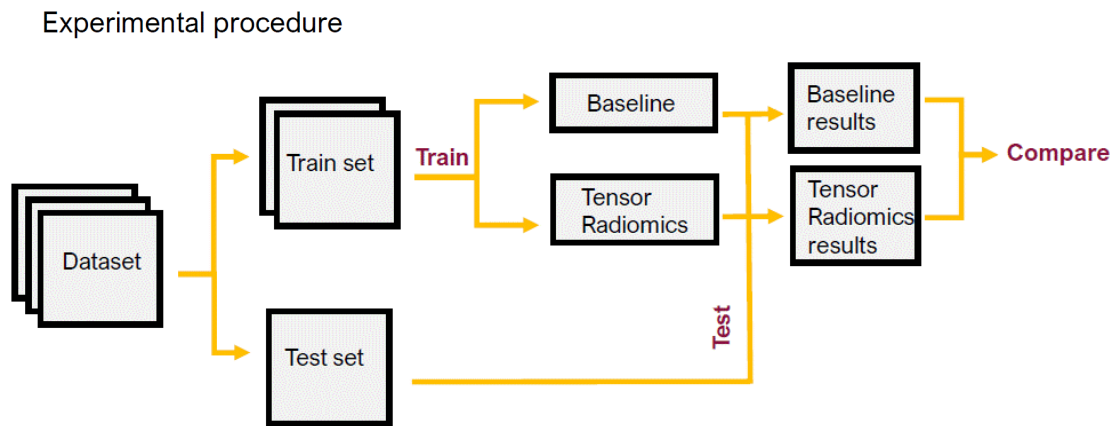

**Figure S1** The framework for TR analysis with bin size flavours.
